# Supplementary material for: Role of genetic mutations in folate-related enzyme genes on Male Infertility
Source: PubMed Central journal article supplement (PMC4637885; doi:10.1038/srep15548), 2015-11-09
Supplement: srep15548-s1.pdf [file srep15548-s1.pdf]

## Role of genetic mutations in folate-related enzyme genes on Male Infertility

Kang Liu<sup>☉</sup>, Ruizhe Zhao<sup>☉</sup>, Min Shen<sup>☉</sup>, Jiaxin Ye, Xiao Li, Yuan Huang, Lixin Hua, Zengjun Wang, Jie Li\*

Department of Urology, The First Affiliated Hospital of Nanjing Medical University, Nanjing, China.

☉ These authors contributed equally to this work.

\* E-mail: lijie\_urology@163.com.

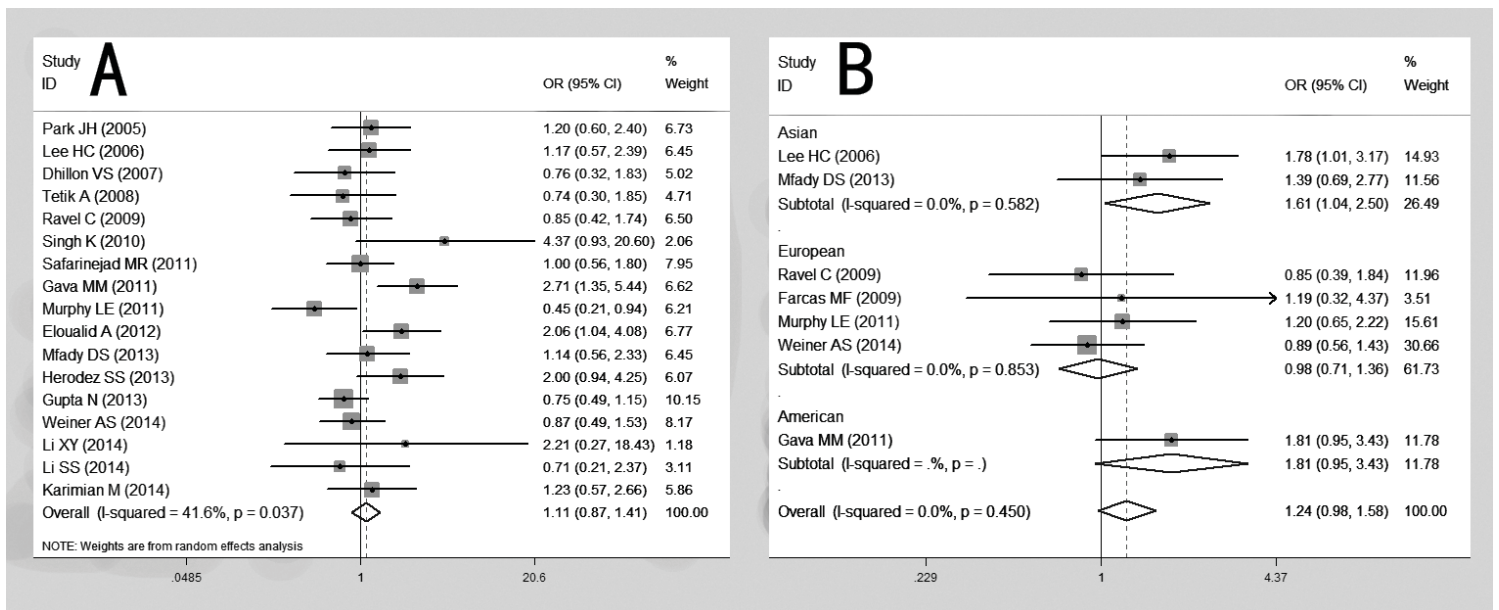

**Supplemental Figure 1** (A) Forest plot of the association between the MTHFR A1298C mutation and male infertility (recessive model); (B) Forest plot of the association between the MTRR A66G mutation and male infertility stratified by ethnicity (homozygote model).

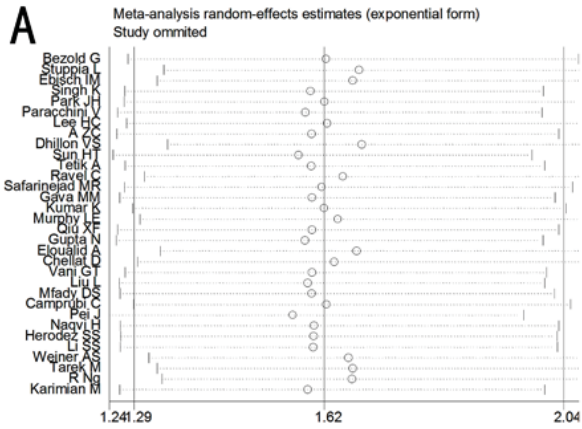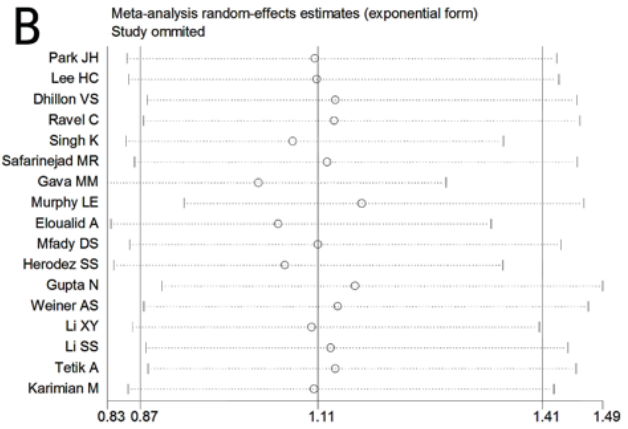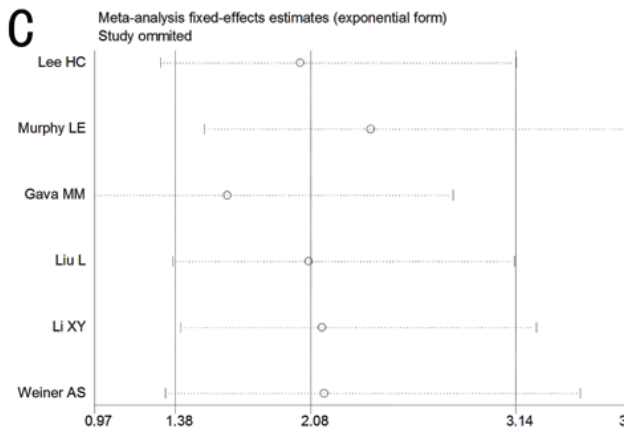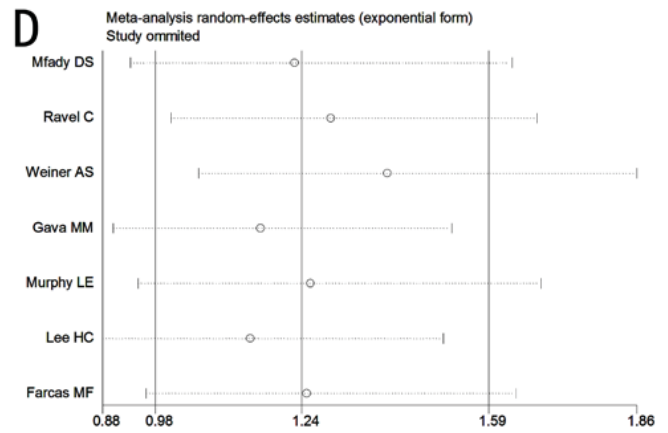

**Supplemental Figure 2** (A) Sensitivity analysis of male infertility risk associated with the MTHFR C677T mutation under the homozygote model; (B) Sensitivity analysis of male infertility risk associated with the MTHFR A1298C mutation under the recessive model; (C) Sensitivity analysis of male infertility risk associated with the MTR A2756G mutation under the recessive model; (D) Sensitivity analysis of male infertility risk associated with the MTRR A66G mutation under the homozygote model.

**Supplemental Table 1. Main characteristics of all studies included in the meta-analysis**

| Name                | Year | Country     | Ethnicity | Genotyping | Mutation | Case |     |     | Azoospermia |     |     | OAT |     |     | Control |     |     | HWE |
|---------------------|------|-------------|-----------|------------|----------|------|-----|-----|-------------|-----|-----|-----|-----|-----|---------|-----|-----|-----|
|                     |      |             |           |            |          | W/W  | W/M | M/M | W/W         | W/M | M/M | W/W | W/M | M/M | W/W     | W/M | M/M |     |
| Bezold G [33]       | 2001 | Germany     | European  | PCR-RFLP   | C677T    | 144  | 93  | 48  | —           | —   | —   | —   | —   | —   | 92      | 89  | 19  | Y   |
| Stuppia L [34]      | 2003 | Italy       | European  | PCR-RFLP   | C677T    | 37   | 37  | 19  | —           | —   | —   | —   | —   | —   | 33      | 43  | 29  | Y   |
| Ebisch IM [35]      | 2003 | Netherlands | European  | SSCP-PCR   | C677T    | 42   | 28  | 7   | —           | —   | —   | —   | —   | —   | 50      | 48  | 15  | Y   |
| Singh K [36]        | 2005 | India       | Asian     | PCR-RFLP   | C677T    | 105  | 40  | 6   | —           | —   | —   | —   | —   | —   | 163     | 37  | 0   | Y   |
| Park JH [37]        | 2005 | Korea       | Asian     | PCR-RFLP   | C677T    | 105  | 205 | 63  | —           | —   | —   | —   | —   | —   | 145     | 200 | 51  | Y   |
|                     |      |             |           |            | A1298C   | 237  | 118 | 18  | —           | —   | —   | —   | —   | —   | 269     | 111 | 16  | Y   |
| Paracchini V [16]   | 2006 | Italy       | European  | SSCP-PCR   | C677T    | 11   | 32  | 16  | —           | —   | —   | —   | —   | —   | 18      | 21  | 7   | Y   |
| Lee HC [18]         | 2006 | Korea       | Asian     | PCR-RFLP   | C677T    | 115  | 181 | 64  | 44          | 100 | 30  | 71  | 81  | 34  | 118     | 166 | 41  | Y   |
|                     |      |             |           |            | A1298C   | 222  | 120 | 18  | 109         | 57  | 8   | 113 | 63  | 10  | 213     | 98  | 14  | Y   |
|                     |      |             |           |            | A2756G   | 270  | 79  | 11  | 124         | 41  | 9   | 146 | 38  | 2   | 255     | 66  | 4   | Y   |
|                     |      |             |           |            | A66G     | 64   | 250 | 46  | 38          | 121 | 15  | 26  | 129 | 31  | 72      | 224 | 29  | N   |
| A ZC [38]           | 2007 | China       | Asian     | PCR-RFLP   | C677T    | 130  | 160 | 65  | 83          | 97  | 48  | 47  | 63  | 17  | 128     | 95  | 29  | Y   |
| Dhillon VS [39]     | 2007 | India       | Asian     | PCR-RFLP   | C677T    | 81   | 77  | 21  | —           | —   | —   | 81  | 77  | 21  | 70      | 100 | 30  | Y   |
|                     |      |             |           |            | A1298C   | 90   | 80  | 9   | —           | —   | —   | 90  | 80  | 9   | 103     | 84  | 13  | Y   |
| Sun HT [40]         | 2007 | China       | Asian     | PCR-RFLP   | C677T    | 27   | 86  | 69  | —           | —   | —   | 22  | 75  | 52  | 15      | 28  | 10  | Y   |
|                     |      |             |           |            | A1298C   | 45   | 41  | 14  | 21          | 23  | 6   | 24  | 18  | 8   | 19      | 22  | 9   | Y   |
| Tetik A [41]        | 2008 | Turkey      | European  | PCR-RFLP   | C677T    | 44   | 44  | 12  | 23          | 22  | 5   | 21  | 22  | 7   | 30      | 20  | 0   | Y   |
| Ravel C [17]        | 2009 | French      | European  | PCR-RFLP   | C677T    | 118  | 101 | 31  | 33          | 31  | 6   | 85  | 70  | 25  | 49      | 52  | 13  | Y   |
|                     |      |             |           |            | A1298C   | 131  | 94  | 25  | 34          | 28  | 7   | 97  | 66  | 18  | 54      | 46  | 13  | Y   |
|                     |      |             |           |            | A66G     | 27   | 132 | 80  | 8           | 39  | 19  | 19  | 93  | 61  | 12      | 57  | 42  | Y   |
| Farcas MF [11]      | 2009 | Romania     | European  | PCR-RFLP   | A66G     | 13   | 46  | 6   | —           | —   | —   | —   | —   | —   | 18      | 42  | 7   | N   |
| Singh K [59]        | 2010 | India       | Asian     | PCR-RFLP   | A1298C   | 66   | 76  | 9   | 66          | 76  | 9   |     |     |     | 64      | 74  | 2   | N   |
| Safarinejad MR [42] | 2011 | Iran        | Asian     | PCR-RFLP   | C677T    | 58   | 80  | 26  | —           | —   | —   | 58  | 80  | 26  | 144     | 148 | 36  | Y   |
|                     |      |             |           |            | A1298C   | 75   | 70  | 19  | —           | —   | —   | 75  | 70  | 19  | 149     | 141 | 38  | Y   |

|                 |      |          |          |                     |        |     |     |     |    |     |     |     |     |    |     |     |    |   |
|-----------------|------|----------|----------|---------------------|--------|-----|-----|-----|----|-----|-----|-----|-----|----|-----|-----|----|---|
| Gava MM [43]    | 2011 | Brazil   | American | Taqman              | C677T  | 81  | 60  | 15  | 27 | 15  | 7   | 54  | 45  | 8  | 167 | 53  | 13 | N |
|                 |      |          |          |                     | A1298C | 71  | 62  | 23  | 26 | 14  | 9   | 45  | 48  | 14 | 130 | 89  | 14 | Y |
| Gava MM [8]     | 2011 | Brazil   | American | Taqman              | A2756G | 78  | 23  | 32  | 31 | 9   | 15  | 47  | 14  | 17 | 109 | 47  | 17 | N |
|                 |      |          |          |                     | A66G   | 37  | 62  | 34  | 17 | 26  | 12  | 20  | 36  | 22 | 59  | 84  | 30 | Y |
| Kumar K [44]    | 2011 | India    | Asian    | PCR-RFLP            | C677T  | 86  | 14  | 0.5 | —  | —   | —   | —   | —   | —  | 81  | 19  | 0  | Y |
| Murphy LE [45]  | 2011 | Sweden   | European | Allele-specific PCR | C677T  | 73  | 63  | 13  | —  | —   | —   | —   | —   | —  | 94  | 73  | 15 | Y |
|                 |      |          |          |                     | A1298C | 58  | 77  | 11  | —  | —   | —   | —   | —   | —  | 87  | 62  | 27 | N |
|                 |      |          |          |                     | A2756G | 100 | 41  | 6   | —  | —   | —   | —   | —   | —  | 116 | 57  | 8  | Y |
|                 |      |          |          |                     | A66G   | 50  | 68  | 32  | —  | —   | —   | —   | —   | —  | 60  | 88  | 32 | Y |
| Qiu XF [46]     | 2011 | China    | Asian    | PCR-RFLP            | C677T  | 75  | 112 | 84  | 42 | 66  | 50  | 33  | 46  | 34 | 63  | 85  | 32 | Y |
| Gupta N [14]    | 2011 | India    | Asian    | Sequencing          | C677T  | 378 | 116 | 28  | 49 | 15  | 4   | 329 | 101 | 24 | 251 | 58  | 6  | Y |
| Eloualid A [47] | 2012 | Morocco  | African  | PCR-RFLP            | C677T  | 152 | 88  | 17  | 65 | 37  | 8   | 87  | 51  | 9  | 351 | 286 | 53 | Y |
|                 |      |          |          |                     | A1298C | 205 | 122 | 17  | 67 | 39  | 4   | 138 | 83  | 13 | 370 | 303 | 17 | N |
| Chellat D [48]  | 2012 | Algeria  | African  | PCR-RFLP            | C677T  | 31  | 33  | 10  | 20 | 19  | 7   | 11  | 14  | 3  | 36  | 38  | 10 | Y |
| Vani GT [49]    | 2012 | India    | Asian    | PCR-RFLP            | C677T  | 158 | 42  | 6   | —  | —   | —   | —   | —   | —  | 188 | 42  | 0  | Y |
| Liu L [50]      | 2012 | China    | Asian    | PCR-RFLP            | C677T  | 27  | 38  | 10  | —  | —   | —   | 27  | 38  | 10 | 40  | 28  | 4  | Y |
|                 |      |          |          |                     | A2756G | 60  | 14  | 1   | —  | —   | —   | 60  | 14  | 1  | 61  | 11  | 0  | Y |
| Mfady DS [51]   | 2013 | Jordan   | Asian    | PCR-RFLP            | C677T  | 67  | 63  | 20  | —  | —   | —   | —   | —   | —  | 74  | 67  | 9  | Y |
|                 |      |          |          |                     | A1298C | 71  | 61  | 18  | —  | —   | —   | —   | —   | —  | 59  | 75  | 16 | Y |
|                 |      |          |          |                     | A66G   | 48  | 78  | 24  | —  | —   | —   | —   | —   | —  | 61  | 67  | 22 | Y |
| Camprubi C [52] | 2013 | USA      | American | PCR-RFLP            | C677T  | 47  | 43  | 17  | —  | —   | —   | —   | —   | —  | 8   | 15  | 2  | Y |
| Pei J [53]      | 2013 | China    | Asian    | PCR-RFLP            | C677T  | 39  | 138 | 113 | 39 | 138 | 113 | —   | —   | —  | 24  | 47  | 19 | Y |
| Naqvi H [54]    | 2013 | India    | Asian    | PCR-RFLP            | C677T  | 447 | 154 | 36  | 34 | 11  | 4   | 413 | 143 | 32 | 275 | 79  | 10 | Y |
| Herodez SS [55] | 2013 | Slovenia | European | Allele-specific PCR | C677T  | 29  | 51  | 20  | —  | —   | —   | —   | —   | —  | 47  | 50  | 14 | Y |
|                 |      |          |          |                     | A1298C | 44  | 35  | 21  | —  | —   | —   | —   | —   | —  | 48  | 50  | 13 | Y |
| Gupta N [60]    | 2013 | India    | Asian    | Sequencing          | A1298C | 165 | 320 | 126 | 13 | 33  | 8   | 73  | 141 | 61 | 27  | 74  | 35 | Y |
| Li SS [56]      | 2014 | China    | Asian    | PCR-RFLP            | C677T  | 14  | 36  | 32  | —  | —   | —   | —   | —   | —  | 36  | 61  | 36 | Y |

|                 |      |        |          |          |        |     |     |    |    |    |    |    |    |    |     |     |    |   |
|-----------------|------|--------|----------|----------|--------|-----|-----|----|----|----|----|----|----|----|-----|-----|----|---|
|                 |      |        |          |          | A1298C | 49  | 29  | 4  | —  | —  | —  | —  | —  | —  | 88  | 36  | 9  | Y |
| Weiner AS [15]  | 2014 | Russia | European | Taqman   | C677T  | 129 | 116 | 26 | 49 | 41 | 8  | 40 | 31 | 11 | 153 | 115 | 33 | Y |
|                 |      |        |          |          | A1298C | 126 | 125 | 23 | 37 | 54 | 8  | 42 | 32 | 9  | 142 | 142 | 30 | Y |
|                 |      |        |          |          | A2756G | 157 | 98  | 18 | 61 | 30 | 7  | 48 | 27 | 8  | 184 | 87  | 10 | Y |
|                 |      |        |          |          | A66G   | 54  | 136 | 82 | 19 | 49 | 31 | 17 | 37 | 28 | 57  | 170 | 97 | Y |
| Hussein TM [57] | 2014 | Egypt  | African  | PCR-RFLP | C677T  | 60  | 29  | 7  | 60 | 29 | 7  | —  | —  | —  | 62  | 32  | 13 | N |
| R Ng [58]       | 2014 | Canada | Mixed    | PCR-RFLP | C677T  | 22  | 14  | 3  | 10 | 10 | 2  | 12 | 4  | 1  | 8   | 5   | 6  | N |
| Li XY [61]      | 2014 | China  | Asian    | Taqman   | A1298C | 101 | 54  | 7  | 66 | 31 | 3  | 35 | 23 | 4  | 34  | 15  | 1  | Y |
|                 |      |        |          |          | A2756G | 124 | 35  | 3  | 74 | 24 | 2  | 50 | 11 | 1  | 40  | 9   | 1  | Y |
| Karimian M [62] | 2014 | Iran   | Asian    | PCR-RFLP | C677T  | 51  | 59  | 8  | —  | —  | —  | —  | —  | —  | 77  | 52  | 3  | Y |
|                 |      |        |          |          | A1298C | 59  | 44  | 15 | —  | —  | —  | —  | —  | —  | 70  | 48  | 14 | Y |

**Supplemental Table 2. Main results for the MTHFR A1298C mutation in the meta-analysis**

| MTHFR<br>A1298C(rs18013131) | Variables                | N <sup>a</sup> | CC vs AA        |                  |                | AC vs AA        |                  |                | AC/CC vs AA     |                  |                | CC vs AC/AA     |                  |                | C vs A          |                  |                |
|-----------------------------|--------------------------|----------------|-----------------|------------------|----------------|-----------------|------------------|----------------|-----------------|------------------|----------------|-----------------|------------------|----------------|-----------------|------------------|----------------|
|                             |                          |                | OR(95%CI)       | FDR <sup>d</sup> | P <sup>b</sup> | OR(95%CI)       | FDR <sup>d</sup> | P <sup>b</sup> | OR(95%CI)       | FDR <sup>d</sup> | P <sup>b</sup> | OR(95%CI)       | FDR <sup>d</sup> | P <sup>b</sup> | OR(95%CI)       | FDR <sup>d</sup> | P <sup>b</sup> |
|                             | <b>Total</b>             | 17             | 1.09(0.86-1.39) | 0.792            | 0.069          | 1.01(0.89-1.15) | 0.896            | 0.094          | 1.02(0.92-1.12) | 0.896            | 0.179          | 1.11(0.87-1.41) | 0.792            | 0.037          | 1.06(0.96-1.17) | 0.792            | 0.057          |
|                             | <b>Consistent to HWE</b> | 14             | 1.05(0.83-1.34) | 0.685            | 0.171          | 1.02(0.90-1.15) | 0.789            | 0.559          | 1.04(0.93-1.16) | 0.643            | 0.359          | 1.07(0.87-1.32) | 0.582            | 0.282          | 1.08(0.96-1.22) | 0.406            | 0.035          |
|                             | <b>Ethnicity</b>         |                |                 |                  |                |                 |                  |                |                 |                  |                |                 |                  |                |                 |                  |                |
|                             | European                 | 5              | 0.87(0.62-1.23) | 0.546            | 0.389          | 1.02(0.74-1.41) | 0.908            | 0.082          | 1.00(0.82-1.22) | 0.975            | 0.355          | 0.87(0.55-1.38) | 0.741            | 0.095          | 1.00(0.86-1.16) | 0.970            | 0.773          |
|                             | Asian                    | 10             | 0.99(0.76-1.27) | 0.912            | 0.430          | 1.05(0.91-1.20) | 0.701            | 0.488          | 1.05(0.92-1.19) | 0.637            | 0.445          | 1.00(0.79-1.26) | 0.982            | 0.605          | 1.08(0.94-1.23) | 0.507            | 0.085          |
|                             | <b>Sample Size</b>       |                |                 |                  |                |                 |                  |                |                 |                  |                |                 |                  |                |                 |                  |                |
|                             | ≥500                     | 5              | 1.04(0.70-1.53) | 0.861            | 0.119          | 0.95(0.76-1.19) | 0.653            | 0.057          | 0.96(0.84-1.11) | 0.581            | 0.067          | 1.07(0.76-1.51) | 0.704            | 0.155          | 0.98(0.85-1.13) | 0.800            | 0.145          |
|                             | < 500                    | 12             | 1.13(0.82-1.56) | 0.861            | 0.098          | 1.05(0.90-1.24) | 0.653            | 0.256          | 1.07(0.93-1.23) | 0.581            | 0.356          | 1.12(0.80-1.57) | 0.704            | 0.039          | 1.12(0.99-1.28) | 0.156            | 0.137          |
|                             | <b>Subgroup</b>          |                |                 |                  |                |                 |                  |                |                 |                  |                |                 |                  |                |                 |                  |                |
|                             | <b>Azoospermia</b>       | 9              | 1.16(0.82-1.64) | 0.950            | 0.155          | 0.99(0.83-1.19) | 0.950            | 0.666          | 1.02(0.86-1.21) | 0.950            | 0.736          | 1.16(0.72-1.87) | 0.950            | 0.063          | 1.02(0.89-1.19) | 0.950            | 0.488          |
|                             | Consistent to HWE        | 7              | 1.03(0.70-1.51) | 0.897            | 0.176          | 1.09(0.88-1.37) | 0.430            | 0.844          | 1.09(0.89-1.35) | 0.405            | 0.877          | 1.00(0.60-1.68) | 0.998            | 0.082          | 1.06(0.89-1.22) | 0.895            | 0.467          |
|                             | European                 | 3              | 0.85(0.48-1.52) | 0.747            | 0.783          | 1.20(0.85-1.70) | 0.608            | 0.500          | 1.13(0.81-1.57) | 0.727            | 0.453          | 0.79(0.46-1.36) | 0.637            | 0.891          | 1.02(0.80-1.30) | 0.892            | 0.526          |
|                             | Asian                    | 4              | 1.10(0.62-1.93) | 0.747            | 0.128          | 1.06(0.81-1.38) | 0.690            | 0.960          | 1.07(0.83-1.38) | 0.727            | 0.858          | 1.13(0.47-2.72) | 0.786            | 0.103          | 1.04(0.85-1.27) | 0.892            | 0.416          |
|                             | <b>OAT<sup>c</sup></b>   | 10             | 1.09(0.84-1.40) | 0.838            | 0.105          | 0.94(0.81-1.09) | 0.838            | 0.169          | 0.98(0.81-1.18) | 0.838            | 0.090          | 1.12(0.88-1.42) | 0.838            | 0.241          | 1.01(0.88-1.17) | 0.838            | 0.087          |
|                             | Consistent to HWE        | 9              | 1.01(0.77-1.32) | 0.957            | 0.177          | 1.01(0.86-1.19) | 0.916            | 0.285          | 1.02(0.83-1.25) | 0.886            | 0.108          | 1.04(0.81-1.33) | 0.768            | 0.495          | 1.03(0.87-1.21) | 0.729            | 0.064          |
|                             | European                 | 3              | 0.84(0.50-1.40) | 0.610            | 0.842          | 0.76(0.54-1.06) | 0.139            | 0.919          | 0.78(0.57-1.06) | 0.207            | 0.915          | 0.96(0.59-1.56) | 0.855            | 0.843          | 0.85(0.67-1.08) | 0.386            | 0.890          |
|                             | Asian                    | 5              | 0.91(0.65-1.29) | 0.610            | 0.426          | 1.04(0.85-1.28) | 0.698            | 0.463          | 1.04(0.83-1.29) | 0.739            | 0.304          | 0.95(0.69-1.29) | 0.855            | 0.677          | 1.02(0.86-1.21) | 0.854            | 0.265          |

<sup>a</sup>Number of studies.

<sup>b</sup>The value of heterogeneity test.

<sup>c</sup>Including OAT, severe OAT, oligozoospermia, and teratozoospermia.

<sup>d</sup>p value in multiple testing (Benjamini-Hochberg methods).

**Supplemental Table 3. Main results for the MTRR A66G mutation in the meta-analysis**

| MTRR<br>A66G(rs1801394)  |                | GG vs AA        |                |                  | AG vs AA        |                |                  | AG/GG vs AA     |                |                  | GG vs AG/AA     |                |                  | G vs A          |                |                  |
|--------------------------|----------------|-----------------|----------------|------------------|-----------------|----------------|------------------|-----------------|----------------|------------------|-----------------|----------------|------------------|-----------------|----------------|------------------|
| Variables                | N <sup>a</sup> | OR(95%CI)       | P <sup>b</sup> | FDR <sup>d</sup> | OR(95%CI)       | P <sup>b</sup> | FDR <sup>d</sup> | OR(95%CI)       | P <sup>b</sup> | FDR <sup>d</sup> | OR(95%CI)       | P <sup>b</sup> | FDR <sup>d</sup> | OR(95%CI)       | P <sup>b</sup> | FDR <sup>d</sup> |
| <b>Total</b>             | 7              | 1.24(0.98-1.58) | 0.450          | 0.180            | 1.12(0.93-1.36) | 0.633          | 0.230            | 1.16(0.97-1.40) | 0.588          | 0.180            | 1.14(0.94-1.38) | 0.492          | 0.230            | 1.10(0.99-1.23) | 0.528          | 0.180            |
| <b>Consistent to HWE</b> | 5              | 1.15(0.87-1.51) | 0.418          | 0.326            | 1.06(0.84-1.33) | 0.525          | 0.646            | 1.10(0.88-1.36) | 0.457          | 0.406            | 1.09(0.88-1.35) | 0.427          | 0.439            | 1.07(0.94-1.22) | 0.341          | 0.327            |
| <b>Ethnicity</b>         |                |                 |                |                  |                 |                |                  |                 |                |                  |                 |                |                  |                 |                |                  |
| European                 | 4              | 0.98(0.71-1.36) | 0.853          | 0.894            | 0.96(0.72-1.27) | 0.688          | 0.768            | 0.97(0.75-1.27) | 0.721          | 0.844            | 0.99(0.78-1.27) | 0.717          | 0.951            | 0.99(0.85-1.15) | 0.824          | 0.880            |
| Asian                    | 2              | 1.61(1.04-2.50) | 0.582          | 0.102            | 1.33(0.98-1.81) | 0.609          | 0.189            | 1.37(1.02-1.84) | 0.743          | 0.111            | 1.34(0.91-1.97) | 0.462          | 0.212            | 1.20(1.00-1.43) | 0.828          | 0.110            |
| <b>Subgroup</b>          |                |                 |                |                  |                 |                |                  |                 |                |                  |                 |                |                  |                 |                |                  |
| <b>Azoospermia</b>       | 4              | 0.83(0.56-1.22) | 0.390          | 0.594            | 0.89(0.66-1.22) | 0.916          | 0.594            | 0.89(0.66-1.19) | 0.803          | 0.594            | 0.88(0.65-1.18) | 0.325          | 0.594            | 0.92(0.78-1.09) | 0.539          | 0.887            |
| Consistent to HWE        | 3              | 1.00(0.62-1.60) | 0.576          | 0.995            | 0.96(0.64-1.46) | 0.891          | 0.863            | 0.98(0.66-1.46) | 0.825          | 0.932            | 0.97(0.69-1.38) | 0.35           | 0.883            | 0.98(0.79-1.23) | 0.492          | 0.350            |
| <b>OAT<sup>c</sup></b>   | 4              | 1.36(0.95-1.94) | 0.299          | 0.217            | 1.09(0.80-1.48) | 0.562          | 0.596            | 1.17(0.87-1.58) | 0.478          | 0.369            | 1.24(0.95-1.61) | 0.325          | 0.217            | 1.13(0.96-1.33) | 0.344          | 0.217            |
| Consistent to HWE        | 3              | 1.24(0.81-1.91) | 0.208          | 0.320            | 0.99(0.66-1.46) | 0.492          | 0.941            | 1.09(0.75-1.58) | 0.359          | 0.654            | 1.19(0.87-1.62) | 0.195          | 0.274            | 1.11(0.90-1.36) | 0.199          | 0.332            |

<sup>a</sup>Number of studies.

<sup>b</sup>The value of heterogeneity test.

<sup>c</sup>Including OAT, severe OAT, oligozoospermia, and teratozoospermia.

<sup>d</sup>p value in multiple testing (Benjamini-Hochberg methods).
